# Supplementary material for: A cationic on–off fluorescent sensor with AIE properties for heparin and protamine detection
Source: Royal Society of Chemistry journal article supplement (doi:10.1039/d1nj02659c), 2021-01-01
Supplement: d1nj02659c1.pdf [file d1nj02659c1.pdf]

## Electronic Supporting Information

### A Cationic On-Off Fluorescent Sensor with AIE Property for Heparin and Protamine Detection

#### Author

Yingxi Zhou,<sup>a</sup> Hongbo Jiang,<sup>b</sup> Yuting Wang,<sup>a</sup> Song Zhao,<sup>a</sup> Lianzhe Hu,<sup>a</sup> Yan Zhang<sup>\*a</sup>

<sup>a</sup>Chongqing Key Laboratory of Green Synthesis and Applications, College of Chemistry, Chongqing Normal University, Chongqing, China.

<sup>b</sup> Bashu Secondary School, Chongqing, China.

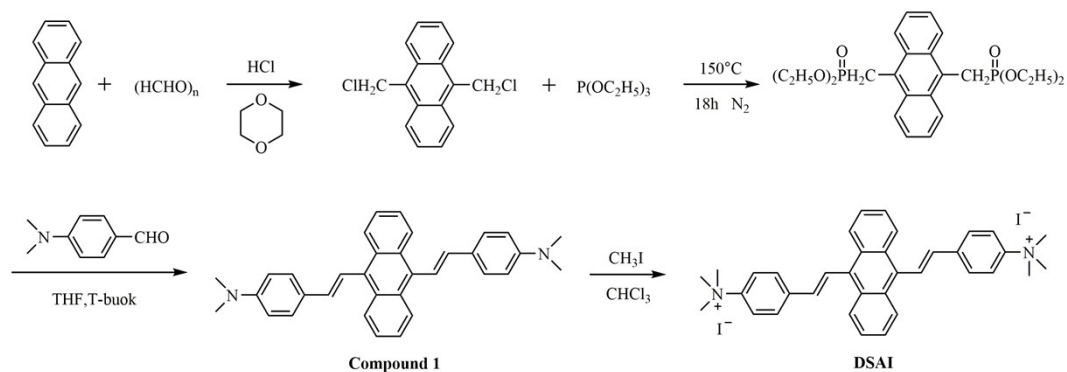

**Scheme. S1** Synthetic route of DSAI molecule.

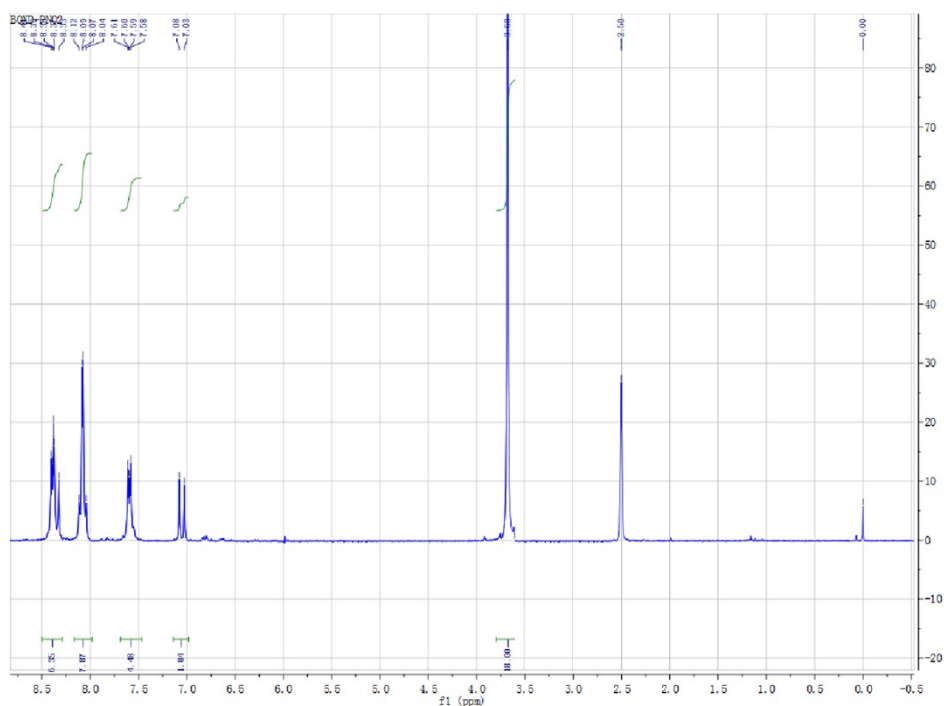

**Fig. S1** <sup>1</sup>H NMR spectrum (300MHz, DMSO-d<sub>6</sub>) of DSAI.

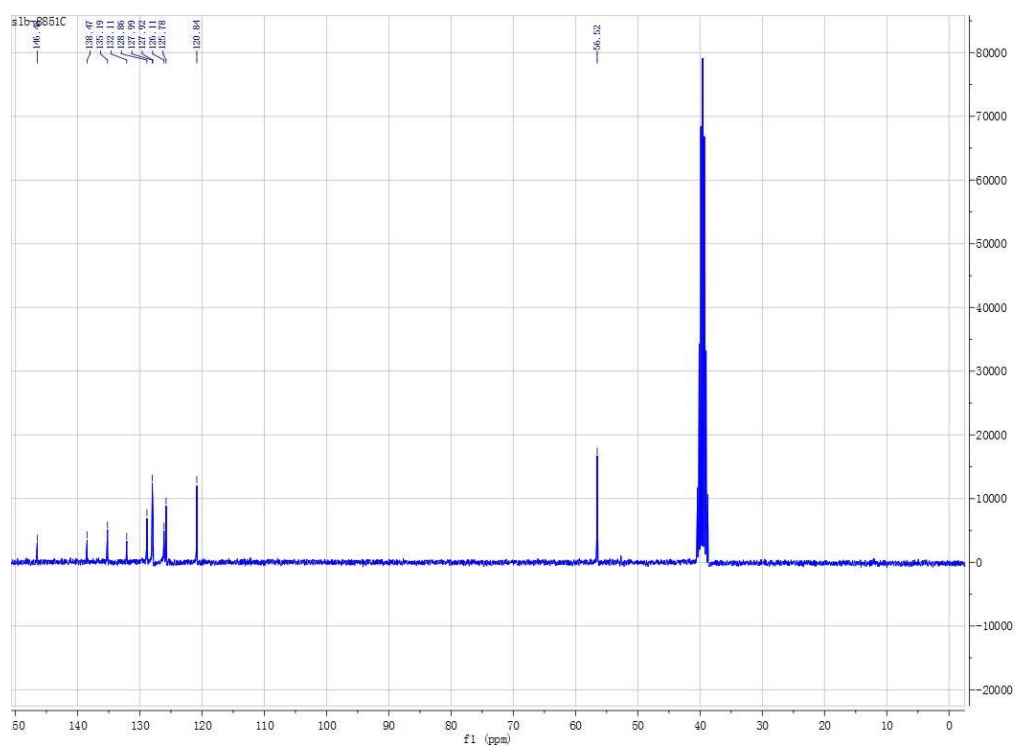

**Fig. S2** <sup>13</sup>C NMR spectrum (75MHz, DMSO-d<sub>6</sub>) of DSAI.

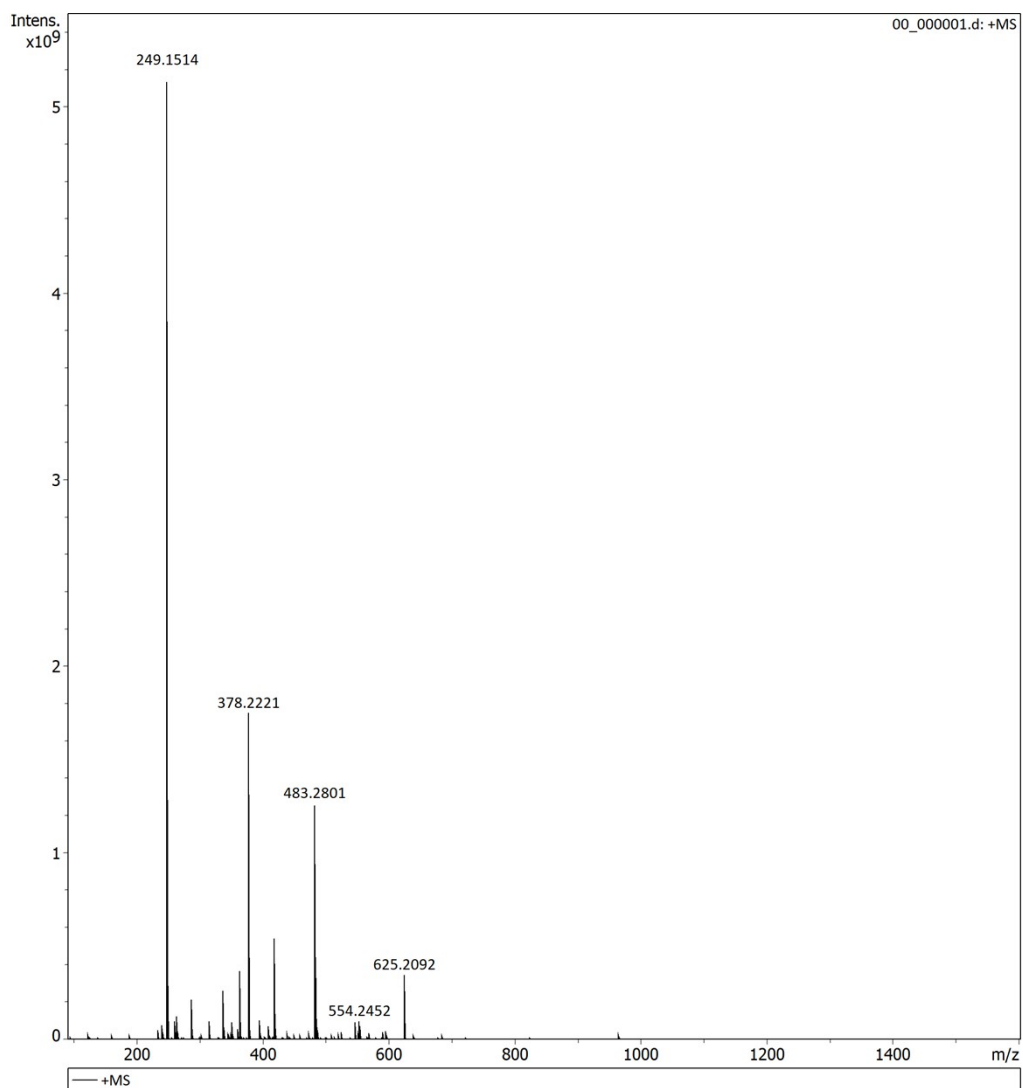

**Fig. S3** High resolution mass spectrum of DSAI.

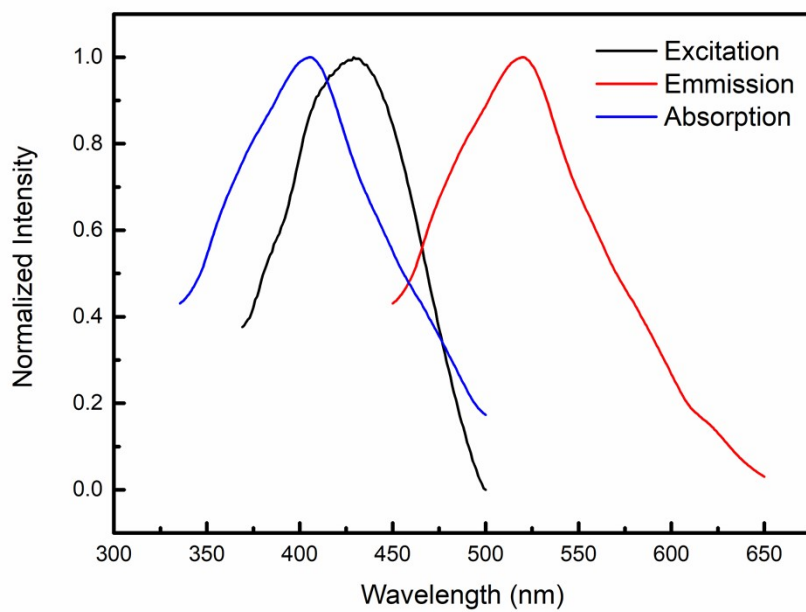

**Fig. S4** Absorption, excitation, emission spectra of Compound 1.

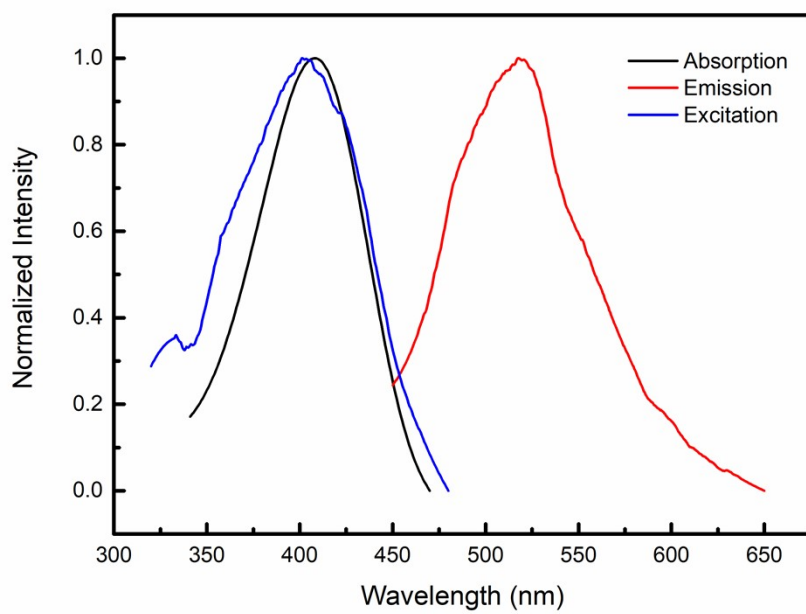

**Fig. S5** Absorption, excitation, emission spectra of DSAI.

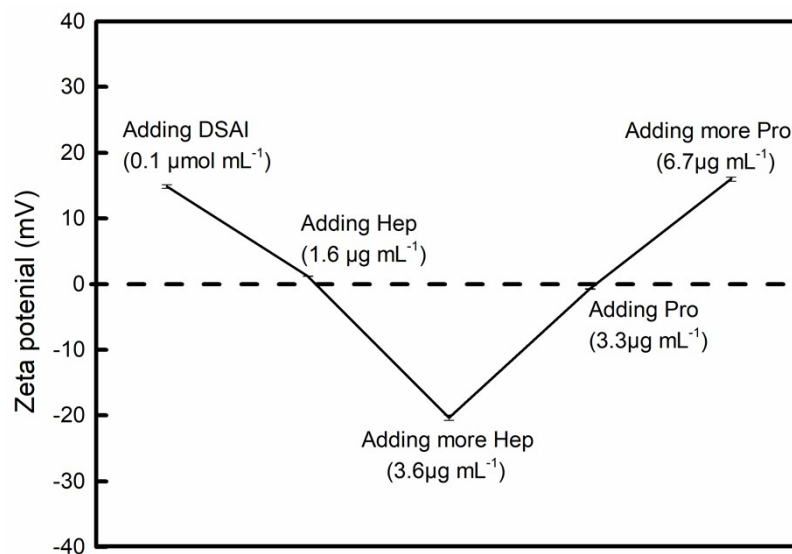

**Fig. S6** Changes in zeta potential with the addition of heparin and protamine.

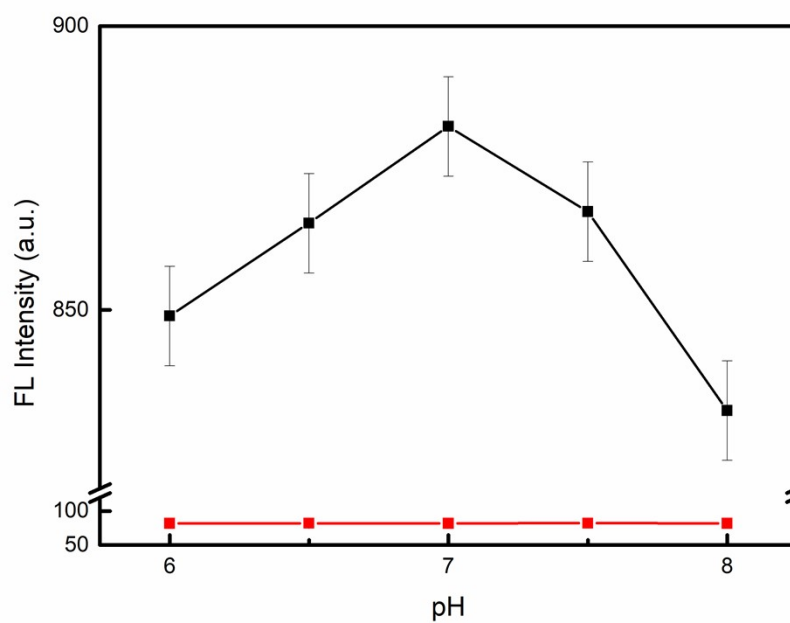

**Fig. S7** The effect of pH on the fluorescence intensity, in 0.2 M phosphate buffer solution with 8  $\mu\text{L}$  DSAI methanol solution ( $0.1 \text{ mmol L}^{-1}$ ) and  $84 \mu\text{g mL}^{-1}$  heparin,  $\lambda_{\text{ex}}=408 \text{ nm}$ ,  $\lambda_{\text{em}}=519 \text{ nm}$ .

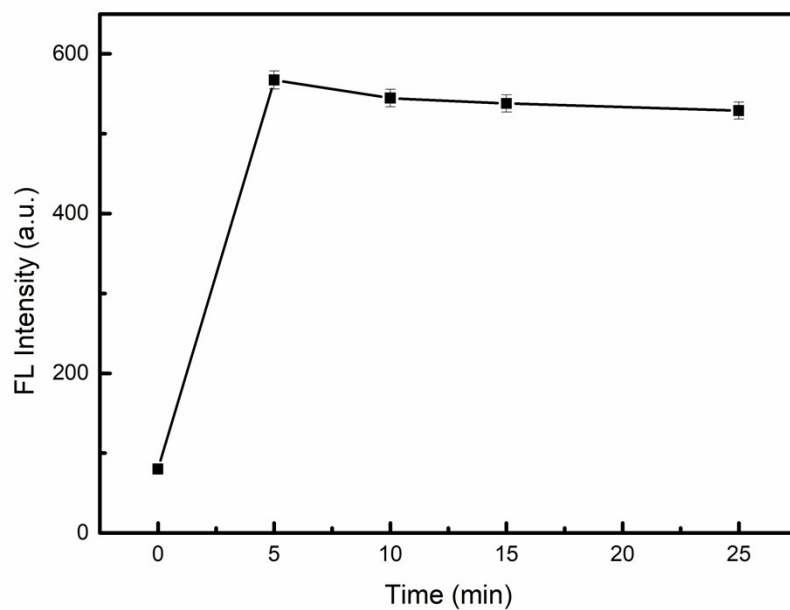

**Fig. S8** The effect of reaction time on the fluorescence intensity, in 0.2 M phosphate buffer solution at pH 7.0 with 8  $\mu\text{L}$  DSAI methanol solution ( $0.1 \text{ mmol L}^{-1}$ ) and  $12 \mu\text{g mL}^{-1}$  heparin,  $\lambda_{\text{ex}}=408 \text{ nm}$ ,  $\lambda_{\text{em}}=519 \text{ nm}$ .

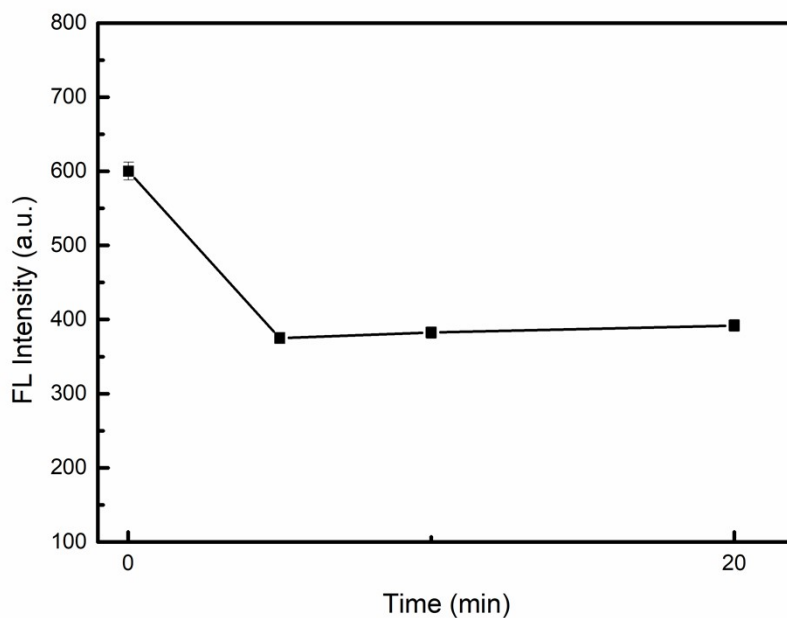

**Fig. S9** The effect of reaction time on the fluorescence intensity, in 0.2 M phosphate buffer solution at pH 7.0 with 8  $\mu\text{L}$  DSAI methanol solution ( $0.1 \text{ mmol L}^{-1}$ ),  $12 \mu\text{g mL}^{-1}$  heparin and  $5 \mu\text{g mL}^{-1}$  protamine,  $\lambda_{\text{ex}}=408 \text{ nm}$ ,  $\lambda_{\text{em}}=519 \text{ nm}$ .

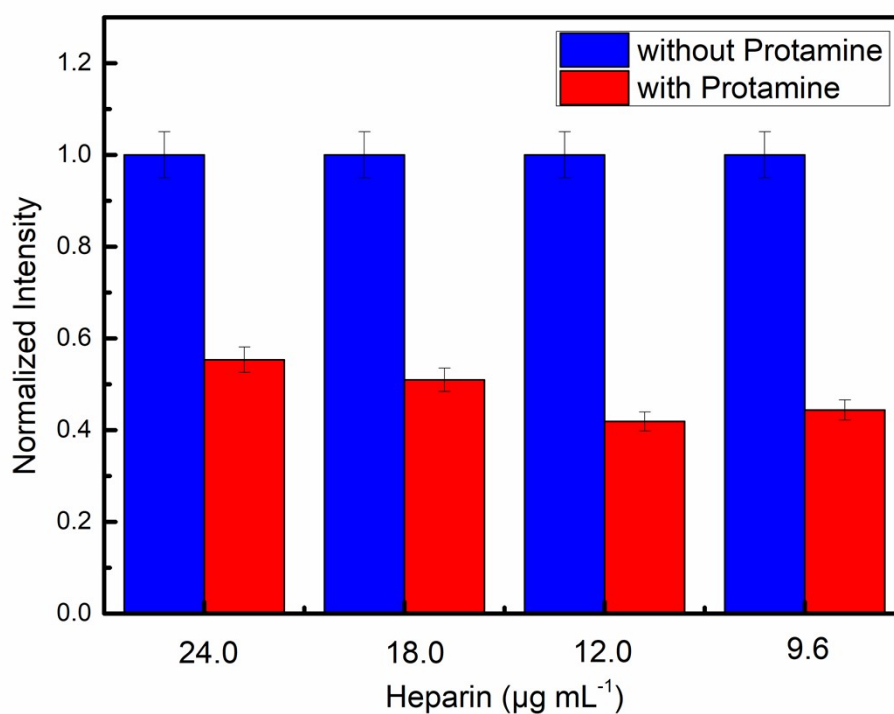

**Fig. S10** The fluorescence of DSAI/Hep complex with different concentrations (24.0  $\mu\text{g mL}^{-1}$ ; 18.0  $\mu\text{g mL}^{-1}$ ; 12.0  $\mu\text{g mL}^{-1}$ , 9.6  $\mu\text{g mL}^{-1}$ ) is quenched to varying degrees (0.45, 0.49, 0.58, 0.56) with excess protamine (100  $\mu\text{g mL}^{-1}$ ).

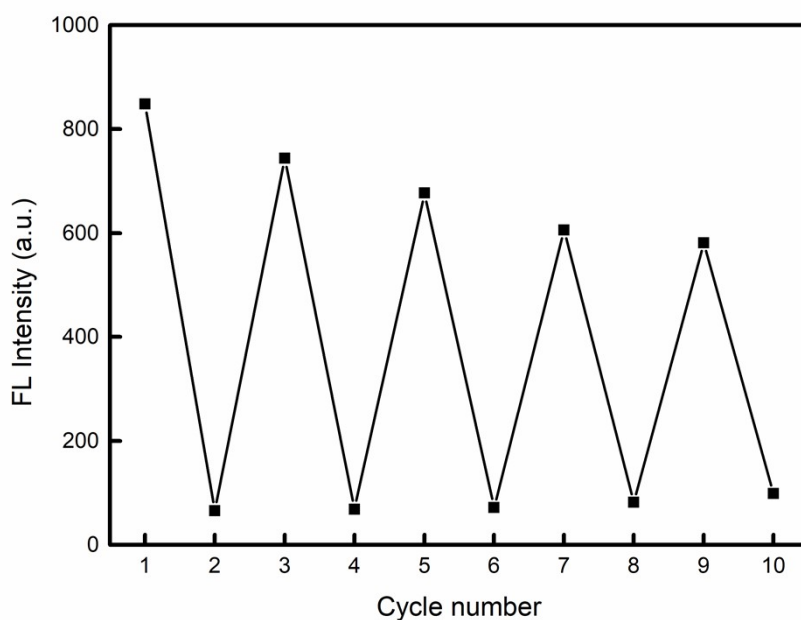

**Fig. S11** The repeatability of the sensor to detect protamine and heparin. The concentration of heparin and protamine were 60  $\mu\text{g mL}^{-1}$  and 50  $\mu\text{g mL}^{-1}$ .

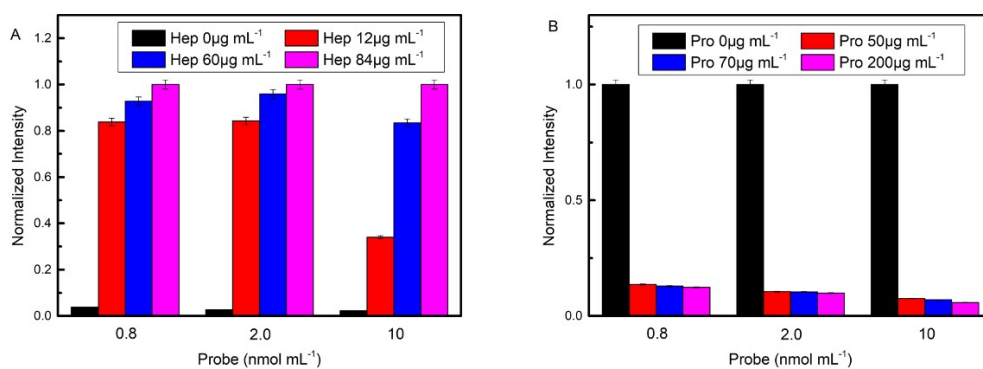

**Fig. S12** (A) Detect different large concentrations of heparin under different concentrations of probes. (B) Detect different large concentrations of protamine under different concentrations of probes. The concentration of heparin was  $60 \mu\text{g mL}^{-1}$ .

**Table S1** Recovery tests of DSAI/Hep complex in 3% goat serum.

| Entry | Added ( $\mu\text{g mL}^{-1}$ ) | Founded ( $\mu\text{g mL}^{-1}$ , n = 3) | Mean Recovery (%) | RSD (%) |
|-------|---------------------------------|------------------------------------------|-------------------|---------|
| 1     | 0.36                            | $0.36 \pm 0.02$                          | 101               | 1.06    |
| 2     | 0.48                            | $0.48 \pm 0.02$                          | 99                | 1.28    |
| 3     | 0.60                            | $0.60 \pm 0.02$                          | 100               | 1.54    |
| 4     | 0.72                            | $0.74 \pm 0.03$                          | 103               | 1.96    |

**Table S2** Recovery tests of DSAI/Hep/Pro complex in 3% goat serum.

| Entry | Added ( $\mu\text{g mL}^{-1}$ ) | Founded ( $\mu\text{g mL}^{-1}$ n = 3) | Mean Recovery (%) | RSD (%) |
|-------|---------------------------------|----------------------------------------|-------------------|---------|
| 1     | 0.50                            | $0.50 \pm 0.02$                        | 100               | 1.46    |
| 2     | 0.70                            | $0.70 \pm 0.03$                        | 100               | 1.77    |
| 3     | 0.80                            | $0.78 \pm 0.04$                        | 98                | 2.27    |
| 4     | 1.00                            | $1.05 \pm 0.05$                        | 105               | 4.16    |
